# Supplementary material for: Diagnostic Potential of Cell-Free and Exosomal MicroRNAs in the Identification of Patients with High-Risk Colorectal Adenomas
Source: PubMed Central journal article supplement (PMC5070810; doi:10.1371/journal.pone.0160722), 2016-10-19

**S4 Fig.**

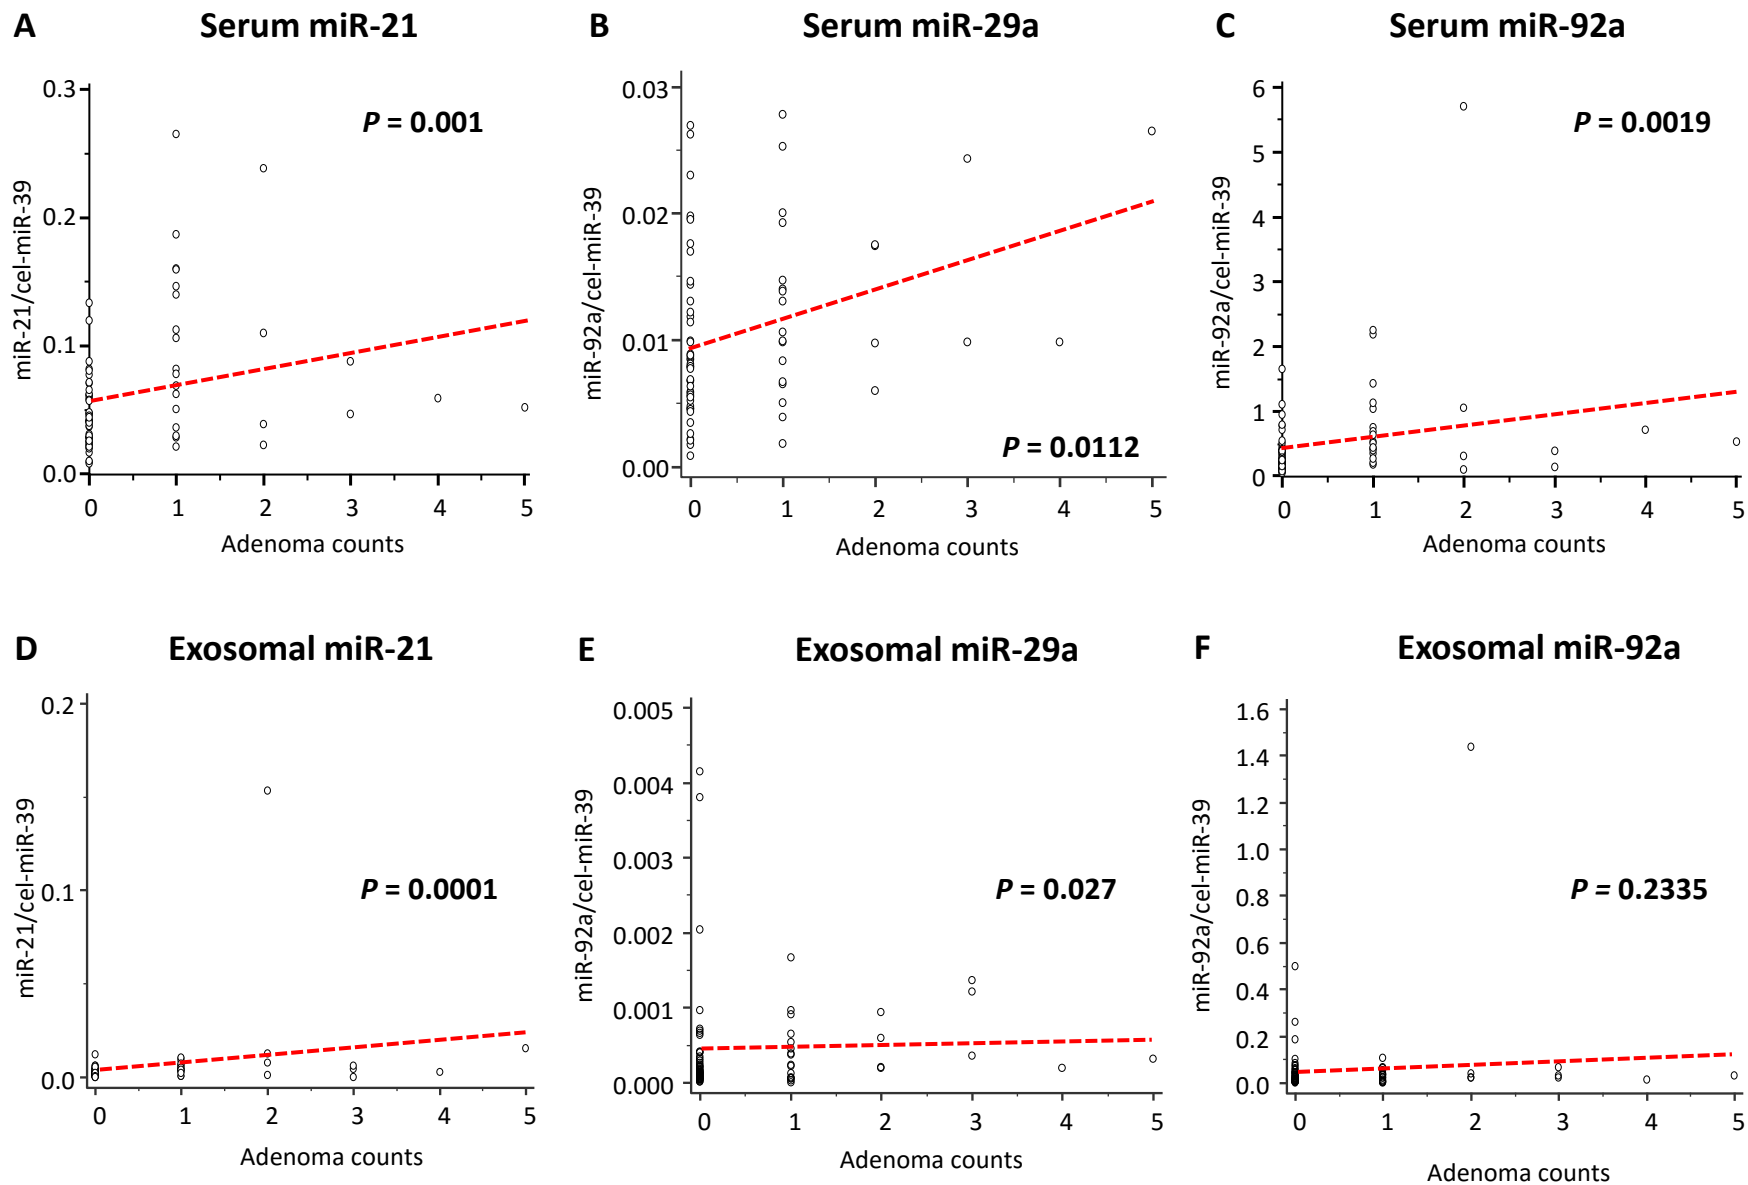

Supplement: pone.0160722.s004.pdf [file pone.0160722.s004.pdf]
